# Supplementary material for: Selective Serotonin Reuptake Inhibitors for the Prevention of Post-Stroke Depression: A Systematic Review and Meta-Analysis
Source: MDPI journal article supplement (doi:10.3390/jcm10245912), 2021-12-16
Supplement: s1 [file s1]

Table S1: Sensitivity analysis for missing data bias

| Study                  | Number  |      | Number of patients with potentially missing data | Number of PSD observed | Additional PSD assuming 20% of patients with missing data had a PSD | Total estimated PSD at 20% | Calculated risk ratio and 95% CI at 20% | Additional PSD assuming 50% of patients with missing data had a PSD | Total estimated PSD at 50% | Calculated risk ratio and 95% CI at 50% |
|------------------------|---------|------|--------------------------------------------------|------------------------|---------------------------------------------------------------------|----------------------------|-----------------------------------------|---------------------------------------------------------------------|----------------------------|-----------------------------------------|
| Rasmussen et al., 2003 | SSRI    | 70   | 35                                               | 8                      | 7                                                                   | 15                         | <b>0.783<br/>(0.693-0.884)</b>          | 18                                                                  | 26                         | <b>0.820 (0.735-0.913)</b>              |
|                        | Placebo | 67   | 35                                               | 19                     | 7                                                                   | 26                         |                                         | 18                                                                  | 37                         |                                         |
| Almeida et al., 2006   | SSRI    | 48   | NA                                               | 8                      | NA                                                                  | NA                         |                                         | NA                                                                  | NA                         |                                         |
|                        | Placebo | 51   | NA                                               | 11                     | NA                                                                  | NA                         |                                         | NA                                                                  | NA                         |                                         |
| Kim et al., 2017       | SSRI    | 210  | 67                                               | 27                     | 13                                                                  | 40                         |                                         | 34                                                                  | 61                         |                                         |
|                        | Placebo | 195  | 73                                               | 25                     | 15                                                                  | 40                         |                                         | 37                                                                  | 62                         |                                         |
| Dennis et al., 2018    | SSRI    | 1564 | 140                                              | 210                    | 28                                                                  | 238                        |                                         | 70                                                                  | 280                        |                                         |
|                        | Placebo | 1563 | 140                                              | 269                    | 28                                                                  | 297                        |                                         | 70                                                                  | 339                        |                                         |
| Hankey et al., 2020    | SSRI    | 642  | 30                                               | 33                     | 6                                                                   | 39                         |                                         | 17                                                                  | 48                         |                                         |
|                        | Placebo | 638  | 17                                               | 46                     | 3                                                                   | 49                         |                                         | 23                                                                  | 55                         |                                         |
| Lundström et al., 2020 | SSRI    | 750  | 38                                               | 54                     | 8                                                                   | 62                         |                                         | 19                                                                  | 73                         |                                         |
|                        | Placebo | 750  | 29                                               | 81                     | 6                                                                   | 87                         |                                         | 15                                                                  | 96                         |                                         |

To test whether a difference in the incidence of PSD among patients with missing data could affect the calculated risk ratio of the meta-analysis, a post-hoc sensitivity analysis was conducted. If PSD were more common in patients with missing data, this could alter the calculated risk ratio towards no effect. The PSD rate was calculated with 20% and inflated to 50% to overestimate the potential additional PSD among participants with missing data. These additional PSD were added to the observed PSD in each group. Recalculation of risk-ratios remained statistically significant at both 20% (RR: 0.783, 95% CI 0.693 to 0.884) and 50% (RR: 0.783, 95% CI 0.693 to 0.884). Therefore, the missing data of the included studies did not significantly alter the findings of this meta-analysis on PSD prevention through SSRI treatment.

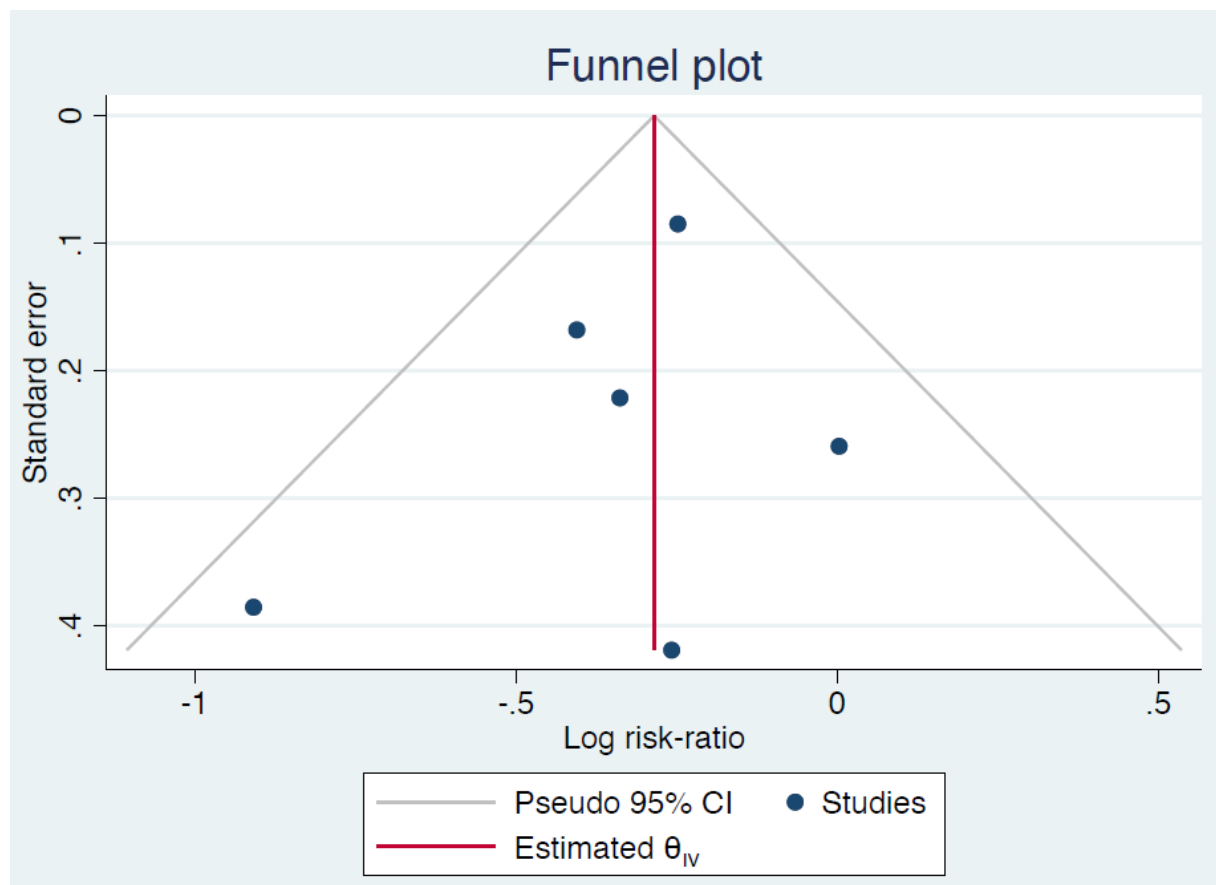

Figure S1: Funnel plot of the included studies

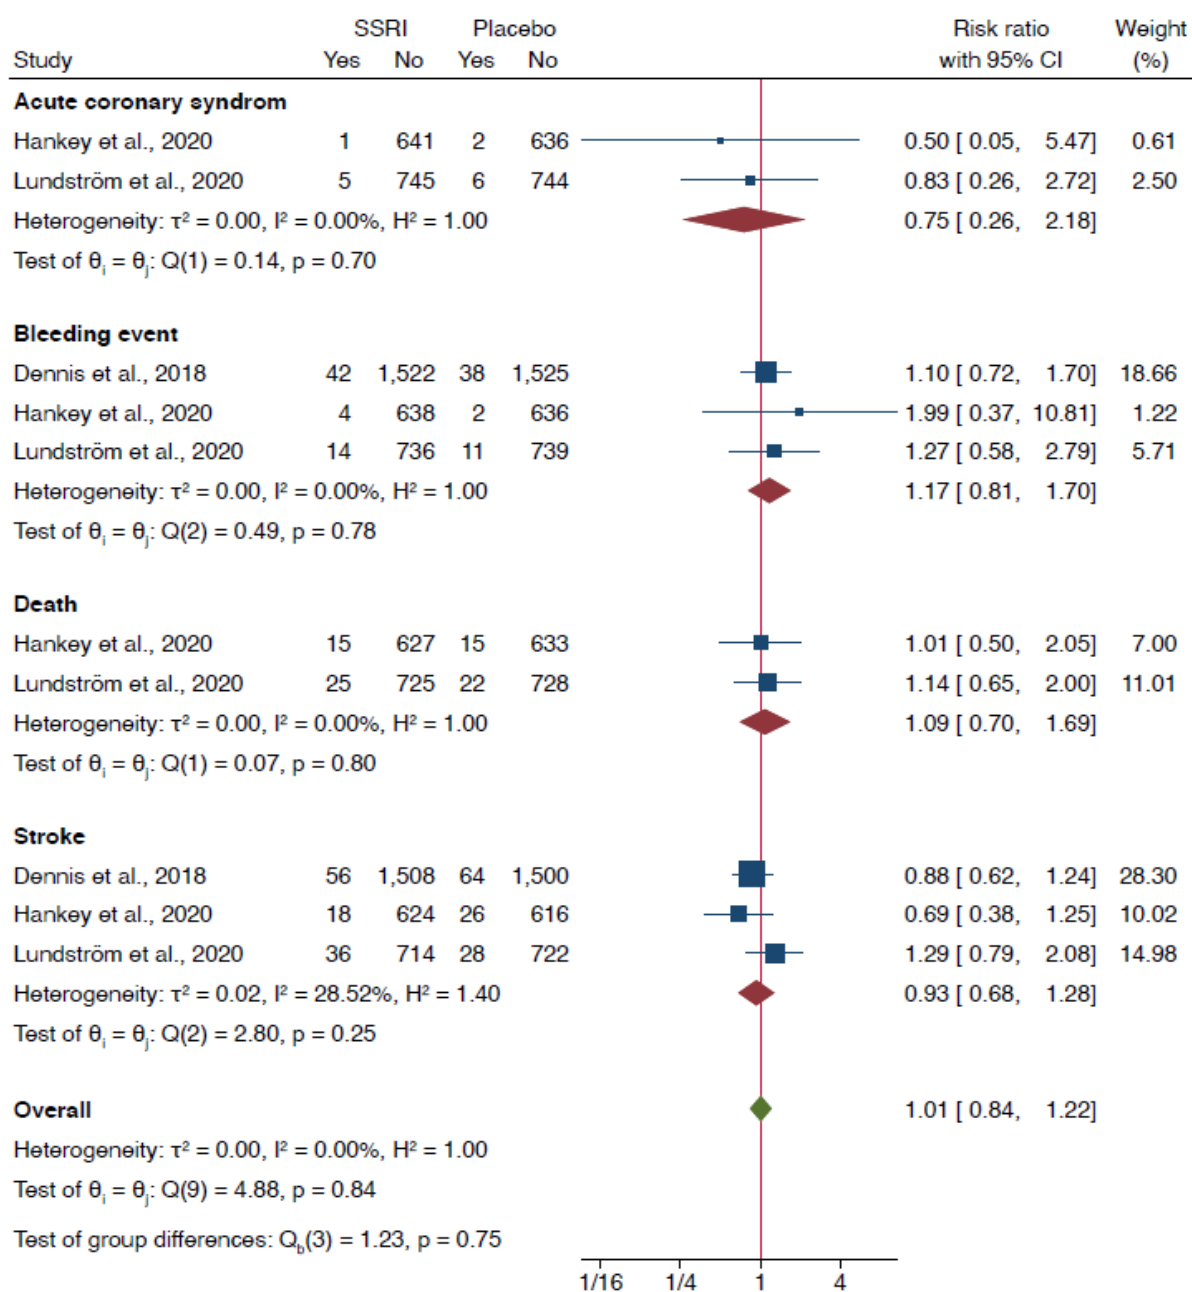

Random-effects DerSimonian–Laird model

Figure S2: Forest plot of important safety outcomes

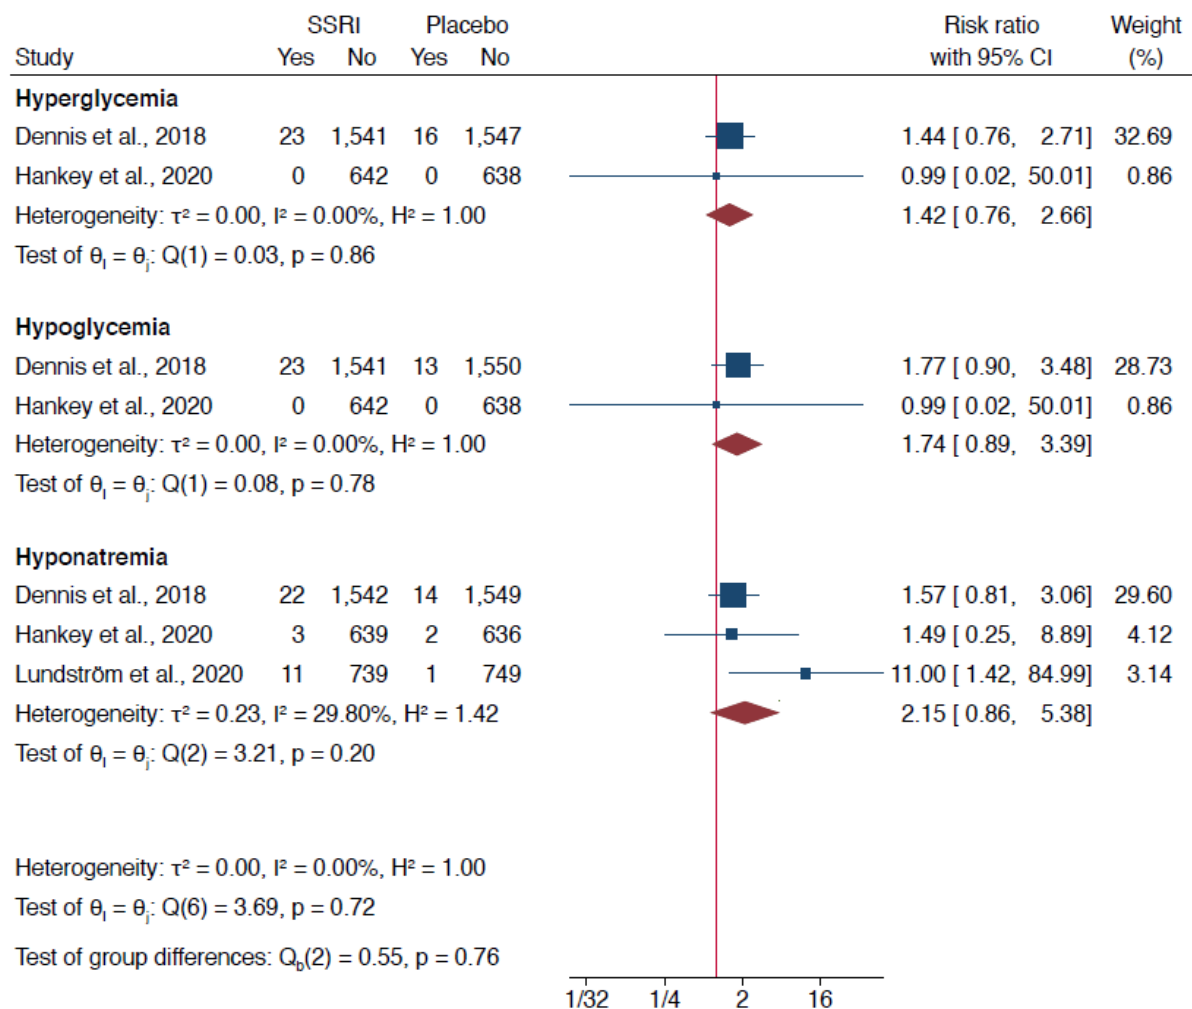

Random-effects REML model

FigureS3: Forest plot of adverse events associated with blood level changes

| Study                                                           | SSRI |       | Placebo |       |  | Risk ratio<br>with 95% CI | Weight<br>(%) |
|-----------------------------------------------------------------|------|-------|---------|-------|--|---------------------------|---------------|
|                                                                 | Yes  | No    | Yes     | No    |  |                           |               |
| <b>Attempted suicide</b>                                        |      |       |         |       |  |                           |               |
| Dennis et al., 2018                                             | 3    | 1,561 | 2       | 1,561 |  | 1.50 [ 0.25, 8.96]        | 1.04          |
| Hankey et al., 2020                                             | 0    | 642   | 2       | 636   |  | 0.20 [ 0.01, 4.13]        | 0.36          |
| Lundström et al., 2020                                          | 1    | 749   | 1       | 749   |  | 1.00 [ 0.06, 15.96]       | 0.44          |
| Heterogeneity: $\tau^2 = 0.00$ , $I^2 = 0.00\%$ , $H^2 = 1.00$  |      |       |         |       |  | 0.92 [ 0.24, 3.52]        |               |
| Test of $\theta_i = \theta_j$ : $Q(2) = 1.27$ , $p = 0.53$      |      |       |         |       |  |                           |               |
| <b>Constipation</b>                                             |      |       |         |       |  |                           |               |
| Rasmussen et al., 2003                                          | 8    | 62    | 11      | 56    |  | 0.70 [ 0.30, 1.62]        | 4.32          |
| Kim et al., 2017                                                | 14   | 217   | 14      | 223   |  | 1.03 [ 0.50, 2.10]        | 5.81          |
| Heterogeneity: $\tau^2 = 0.00$ , $I^2 = 0.00\%$ , $H^2 = 1.00$  |      |       |         |       |  | 0.87 [ 0.50, 1.51]        |               |
| Test of $\theta_i = \theta_j$ : $Q(1) = 0.47$ , $p = 0.49$      |      |       |         |       |  |                           |               |
| <b>Diarrhea</b>                                                 |      |       |         |       |  |                           |               |
| Rasmussen et al., 2003                                          | 11   | 59    | 7       | 60    |  | 1.50 [ 0.62, 3.65]        | 3.97          |
| Kim et al., 2017                                                | 2    | 229   | 7       | 230   |  | 0.29 [ 0.06, 1.40]        | 1.35          |
| Heterogeneity: $\tau^2 = 0.92$ , $I^2 = 68.63\%$ , $H^2 = 3.19$ |      |       |         |       |  | 0.76 [ 0.16, 3.68]        |               |
| Test of $\theta_i = \theta_j$ : $Q(1) = 3.19$ , $p = 0.07$      |      |       |         |       |  |                           |               |
| <b>Dizziness</b>                                                |      |       |         |       |  |                           |               |
| Rasmussen et al., 2003                                          | 16   | 54    | 16      | 51    |  | 0.96 [ 0.52, 1.76]        | 7.80          |
| Almeida et al., 2006                                            | 3    | 45    | 5       | 39    |  | 0.55 [ 0.14, 2.17]        | 1.73          |
| Kim et al., 2017                                                | 8    | 229   | 10      | 221   |  | 0.78 [ 0.31, 1.94]        | 3.77          |
| Heterogeneity: $\tau^2 = 0.00$ , $I^2 = 0.00\%$ , $H^2 = 1.00$  |      |       |         |       |  | 0.85 [ 0.53, 1.36]        |               |
| Test of $\theta_i = \theta_j$ : $Q(2) = 0.57$ , $p = 0.75$      |      |       |         |       |  |                           |               |
| <b>Drowsiness</b>                                               |      |       |         |       |  |                           |               |
| Almeida et al., 2006                                            | 8    | 40    | 6       | 38    |  | 1.22 [ 0.46, 3.24]        | 3.32          |
| Kim et al., 2017                                                | 1    | 236   | 1       | 230   |  | 0.97 [ 0.06, 15.49]       | 0.44          |
| Heterogeneity: $\tau^2 = 0.00$ , $I^2 = 0.00\%$ , $H^2 = 1.00$  |      |       |         |       |  | 1.19 [ 0.47, 2.99]        |               |
| Test of $\theta_i = \theta_j$ : $Q(1) = 0.02$ , $p = 0.88$      |      |       |         |       |  |                           |               |
| <b>Fall with injury</b>                                         |      |       |         |       |  |                           |               |
| Dennis et al., 2018                                             | 120  | 1,444 | 94      | 1,469 |  | 1.28 [ 0.98, 1.66]        | 25.39         |
| Hankey et al., 2020                                             | 20   | 622   | 7       | 631   |  | 2.84 [ 1.21, 6.67]        | 4.25          |
| Heterogeneity: $\tau^2 = 0.22$ , $I^2 = 67.59\%$ , $H^2 = 3.09$ |      |       |         |       |  | 1.71 [ 0.80, 3.64]        |               |
| Test of $\theta_i = \theta_j$ : $Q(1) = 3.09$ , $p = 0.08$      |      |       |         |       |  |                           |               |

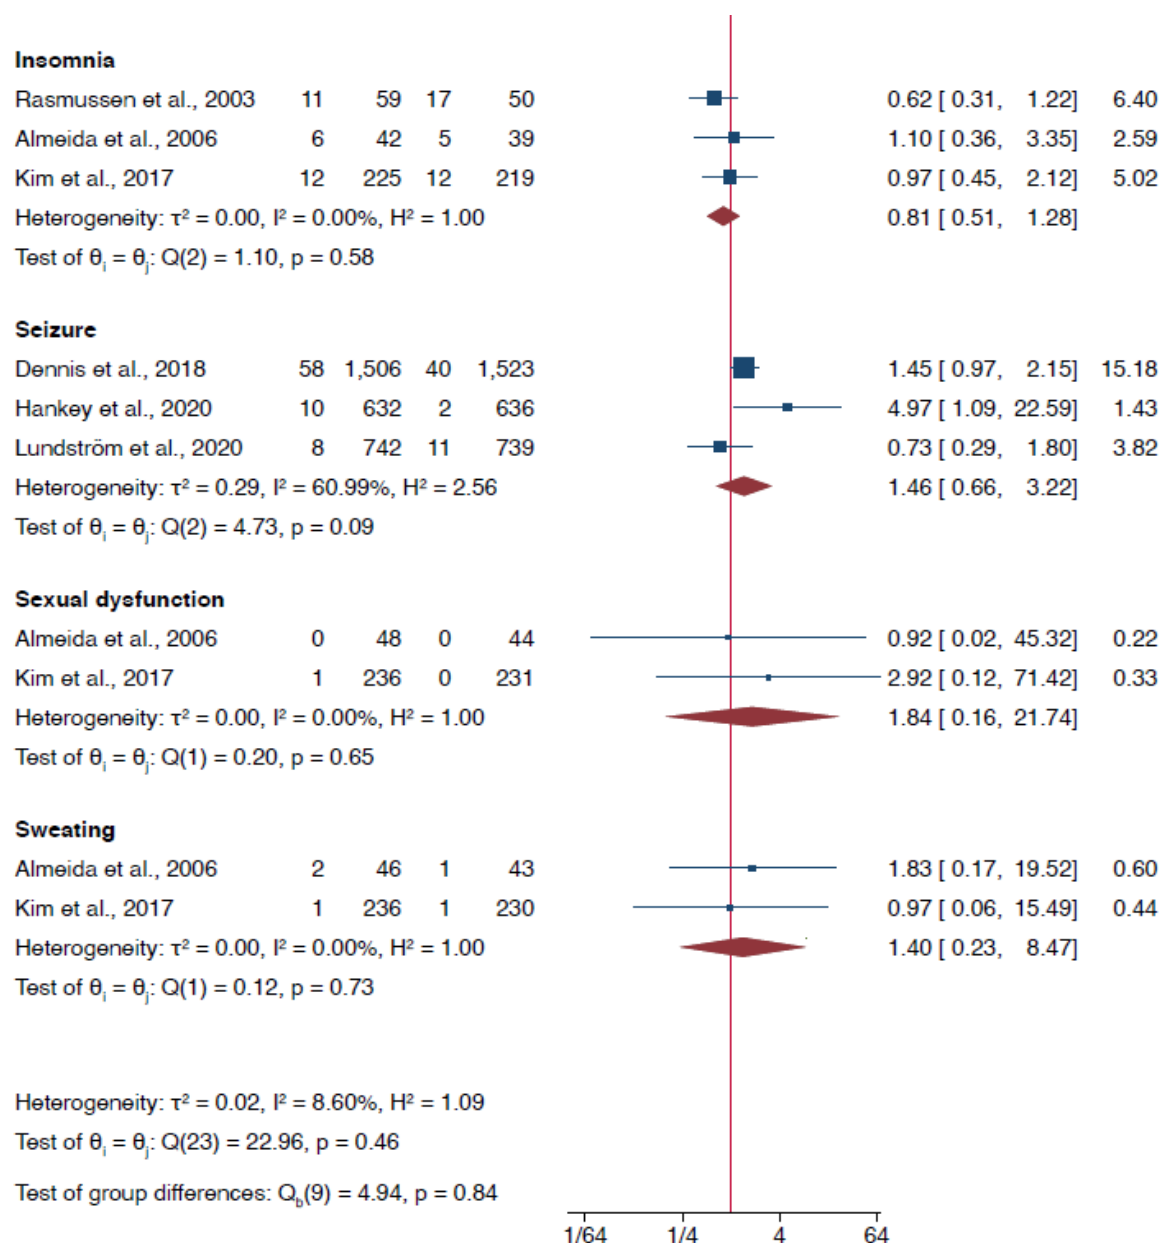

Random-effects REML model  
 FIGURE S4: Forest plot of other adverse events

| Study                  | Randomization process | Deviations from intended intervention | Missing outcome data | Measurement of the outcome | Selection of the reported result | Overall bias  |
|------------------------|-----------------------|---------------------------------------|----------------------|----------------------------|----------------------------------|---------------|
| Rasmussen et al., 2003 | Unclear               | Unclear                               | High                 | Low                        | Low                              | Some concerns |
| Almeida et al., 2006   | Low                   | Low                                   | Unclear              | Low                        | Low                              | Some concerns |
| Kim et al., 2017       | Low                   | Low                                   | Some concerns        | Low                        | Low                              | Some concerns |
| Dennis et al., 2018    | Low                   | Low                                   | Some concerns        | Low                        | Low                              | Some concerns |
| Hankey et al., 2020    | Low                   | Low                                   | Some concerns        | Low                        | Low                              | Some concerns |
| Lundström et al., 2020 | Low                   | Low                                   | Some concerns        | Low                        | Low                              | Some concerns |

FIGURE S5: Risk of bias assessment
